# Supplementary material for: Identification of Functional Domain(s) of Fibrillarin Interacted with p2 of Rice stripe virus
Source: Hindawi journal article supplement (doi:10.1155/2018/8402839), 2018-01-01

## Supplements

Fig.S1 Co-transformants of yeast cells on SD/Trp-Leu-

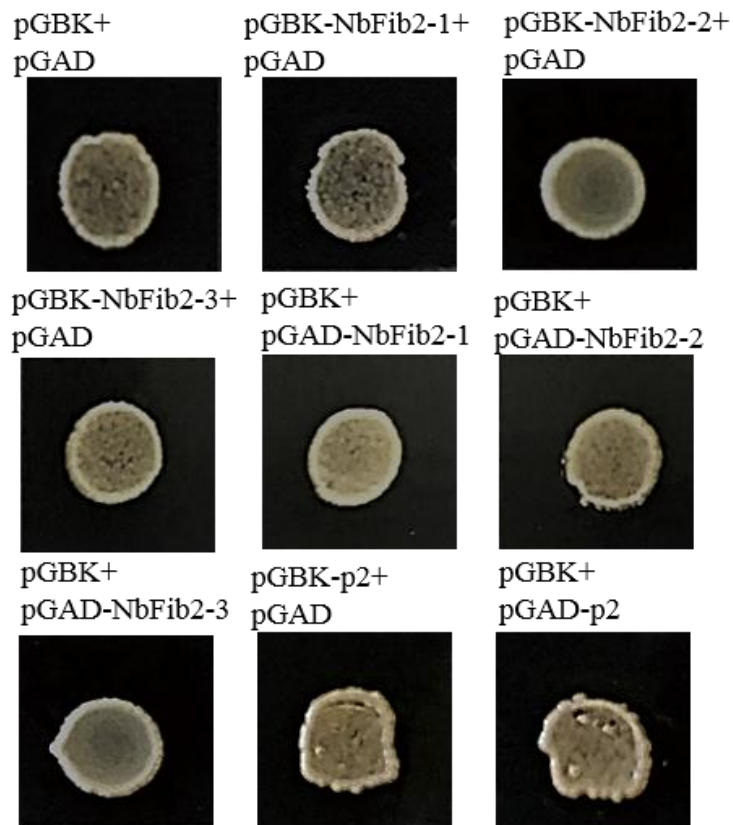

Supplement: f1 [file 8402839.f1.pdf]
